# Supplementary material for: Precise preparation of layered Na0.5Ni0.25Mn0.75O2 micro-sheets for 3.8 V Na-ion batteries
Source: Royal Society of Chemistry journal article supplement (doi:10.1039/c7cc04328g), 2017-01-01
Supplement: c7cc04328g1.pdf [file c7cc04328g1.pdf]

## Supplementary data

### Precise preparation of layered $\text{Na}_{0.5}\text{Ni}_{0.25}\text{Mn}_{0.75}\text{O}_2$ micro-sheets for 3.8 V Na-ion batteries

Jingang Yang,<sup>\*a,b</sup> Tingting Yuan,<sup>a</sup> Biao Guo,<sup>a</sup> Chunlong Dai,<sup>a</sup> Yuan Liu,<sup>a</sup> Guannan Li,<sup>a</sup> Gang Liu,<sup>a</sup> and Maowen Xu<sup>a</sup>

<sup>a</sup> Faculty of Materials and Energy, Southwest University, Chongqing 400715, China

<sup>b</sup> Key Laboratory of Advanced Energy Materials Chemistry (Ministry of Education), Nankai University, Tianjin 300071, China

E-mail: yjg20140716@swu.edu.cn

#### Experimental

$\text{Na}_{0.5}\text{Ni}_{0.25}\text{Mn}_{0.75}\text{O}_2$  micro-sheets were synthesized by a polyethylene glycol (PEG)-assisted co-precipitation method. In a typical synthesis, analytical reagent grade  $\text{NaCH}_3\text{COO}\cdot 3\text{H}_2\text{O}$ ,  $\text{Ni}(\text{CH}_3\text{COO})_2\cdot 4\text{H}_2\text{O}$ , and  $\text{Mn}(\text{CH}_3\text{COO})_2\cdot 4\text{H}_2\text{O}$  in the molar ratio of 0.5:0.25:0.75 and in quantities corresponding to 0.40 g of  $\text{Na}_{0.5}\text{Ni}_{0.25}\text{Mn}_{0.75}\text{O}_2$  were dissolved in 20 mL of water. The solution was heated to 50 °C and then 2 mL of PEG 400 was added. Under constant magnetic stirring, 1.8 g of tartaric acid was added to the solution. Then the solution was heated to 85 °C to afford a green viscous precursor. The precursor was calcined at 400°C for 5h and 1000°C for 20 h in air to obtain the  $\text{Na}_{0.5}\text{Ni}_{0.25}\text{Mn}_{0.75}\text{O}_2$  micro-sheets. We have also prepared a batch of samples by controlling the annealing temperature (700-900 °C) for comparison.

#### Material Characterization

The structures of the as-synthesized samples were characterized by powder X-ray diffraction (XRD, Rigaku MiniFlex600, Cu K $\alpha$  radiation). The morphologies of the samples were observed by scanning electron microscopy (SEM, JEOL, JSM-7500F). The high-resolution transmission electron microscopy (HRTEM, tecnai G2 F20) equipped with an energy dispersive X-ray detector (EDX) were employed to investigate the particle distribution and surface morphologies of the synthesized samples. X-ray photoelectron spectroscopy (XPS) data were collected using a Perkin Elmer PHI 1600 ESCA system. The inductively coupled plasma-atomic emission spectroscopy (ICP-900, Thermo Jarrell-Ash Corp) was used to check the elemental stoichiometry ratio of Na<sub>0.5</sub>Ni<sub>0.25</sub>Mn<sub>0.75</sub>O<sub>2</sub> micro-sheets. Furthermore, to measure the tap density, a certain amount of the Na<sub>0.5</sub>Ni<sub>0.25</sub>Mn<sub>0.75</sub>O<sub>2</sub> micro-sheet product was placed in a small measuring cylinder and tapped for at least 30 min by hand. The measured volume of the tapped powder and its mass were used to calculate the tap density of Na<sub>0.5</sub>Ni<sub>0.25</sub>Mn<sub>0.75</sub>O<sub>2</sub> micro-sheets.

The working electrodes were made from a mixture of 80 wt. % of the active material, 15 wt. % of the conducting agent (Super P), and 5 wt. % of the polyvinylidene difluoride (PVDF) binder. The counter/reference electrode was sodium metal, and the separator was glass fiber. The electrolyte solution was 1 M NaClO<sub>4</sub> dissolved in ethylene carbonate/diethyl carbonate (EC/DEC, 1:1 in volume). The assembled cells were cycled at different charge-discharge rates in the voltage range of 3.2 – 4.3 V on a CT2001A cell test instrument (LAND Electronic Co.). The specific capacity was calculated on the basis of the amount of the active material. The cyclic voltammograms (CV) were performed with a Parstat 263A electrochemical workstation (AMTECT Company).

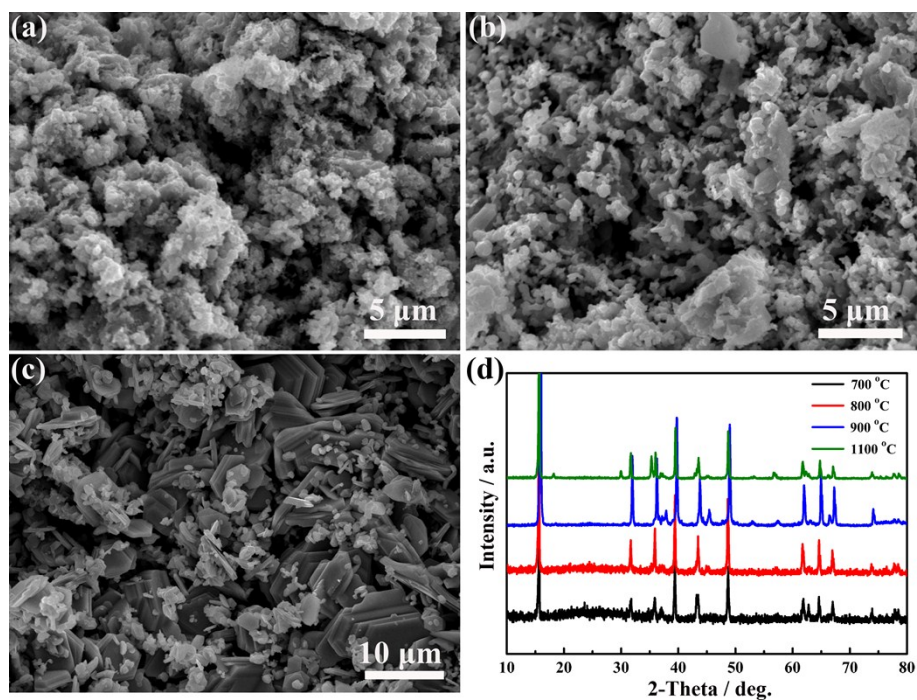

Fig. S1 SEM images (a-c) and XRD patterns (d) of samples prepared with different annealing temperature (a) 700 °C, (b) 800 °C and (c) 900 °C. When annealing temperature below 800 °C, the sample presents in the form of irregular nanoparticles, while the phase is not belong to P2-type  $\text{Na}_{0.5}\text{Ni}_{0.25}\text{Mn}_{0.75}\text{O}_2$ . When the calcination temperature is higher than 800 °C, P2-type  $\text{Na}_{0.5}\text{Ni}_{0.25}\text{Mn}_{0.75}\text{O}_2$  has form and the crystallinity increases with the annealing temperature. Meanwhile the nanoparticles began to melt into micro-sheets and at calcination temperature of 1000 °C, the sample appears completely in the micro-sheet structure. When the temperature reached 1100 °C, some other diffraction peaks are detected, suggesting the appearance of impurity.

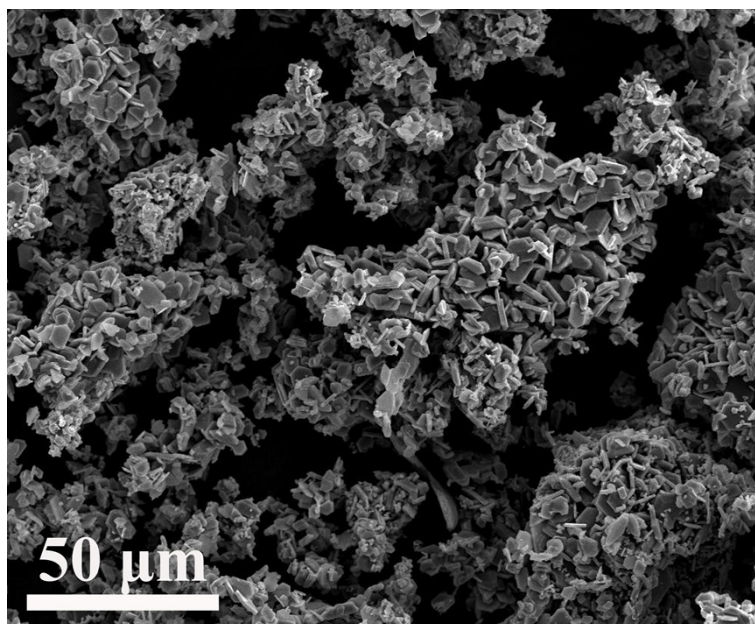

Fig. S2 Low-Resolution SEM image of  $\text{Na}_{0.5}\text{Ni}_{0.25}\text{Mn}_{0.75}\text{O}_2$  micro-sheets.

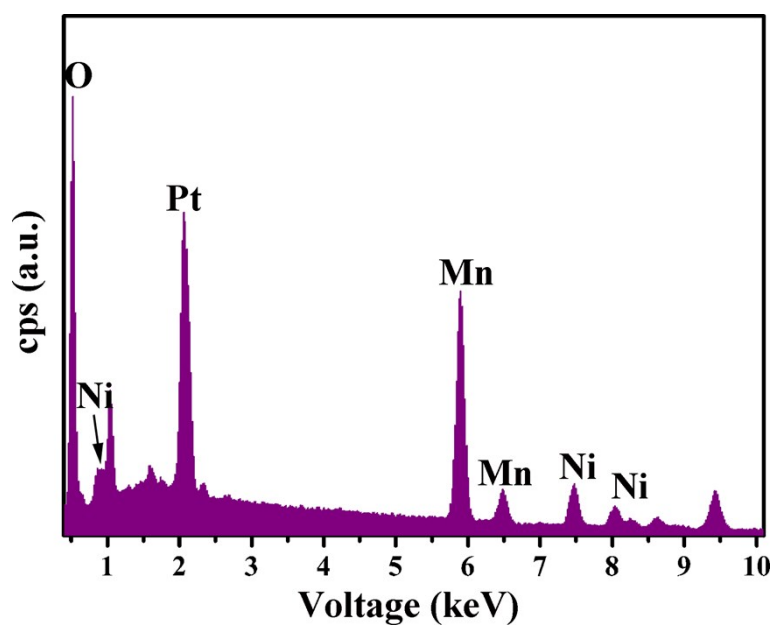

Fig. S3 EDS image of  $\text{Na}_{0.5}\text{Ni}_{0.25}\text{Mn}_{0.75}\text{O}_2$  micro-sheets.

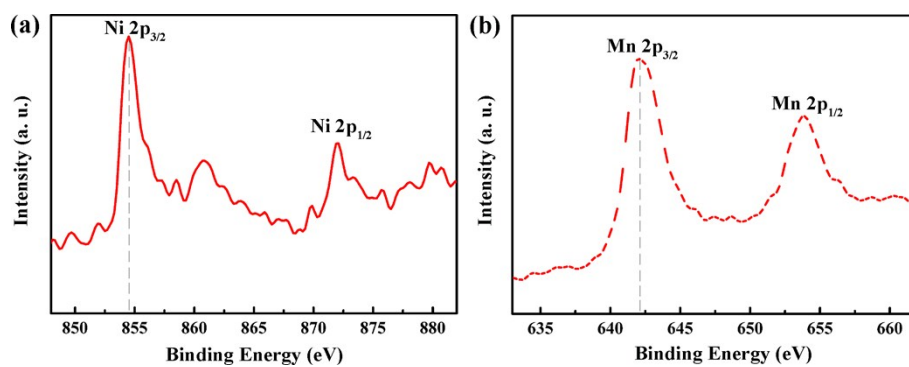

Fig. S4 XPS spectrum of Na<sub>0.5</sub>Ni<sub>0.25</sub>Mn<sub>0.75</sub>O<sub>2</sub> micro-sheets.

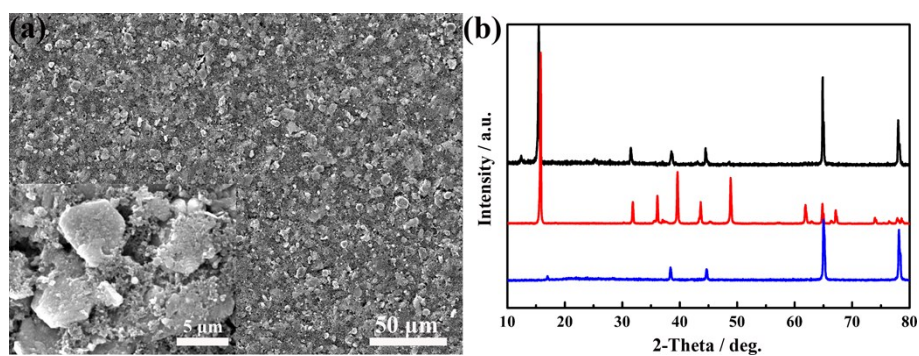

Fig. S5 SEM and XRD of the Na<sub>0.5</sub>Ni<sub>0.25</sub>Mn<sub>0.75</sub>O<sub>2</sub> micro-sheet electrode in full discharged state after 50 cycles at 0.2 C rate. In the XRD pattern, the black line (top) indicates the experimental data of cycled Na<sub>0.5</sub>Ni<sub>0.25</sub>Mn<sub>0.75</sub>O<sub>2</sub> micro-sheet electrode, red line (middle) is as-prepared Na<sub>0.5</sub>Ni<sub>0.25</sub>Mn<sub>0.75</sub>O<sub>2</sub> micro-sheets and blue line (bottom) represents the Al that is the current collector used for the cathode.

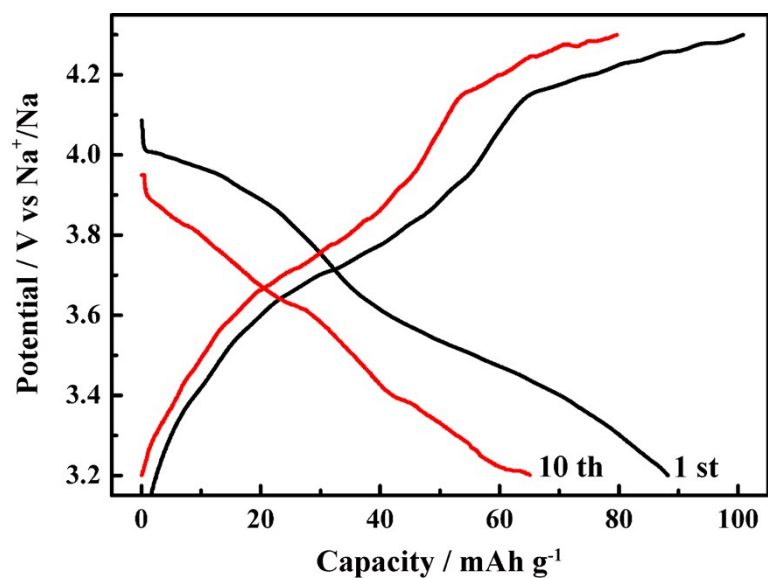

Fig. S6 Typical charge–discharge curves and cycling performance of  $\text{Na}_{0.5}\text{Ni}_{0.25}\text{Mn}_{0.75}\text{O}_2$  granular materials (mixed nanoparticles and micro-particles, at annealing temperature of 800 °C) at 0.2 C.

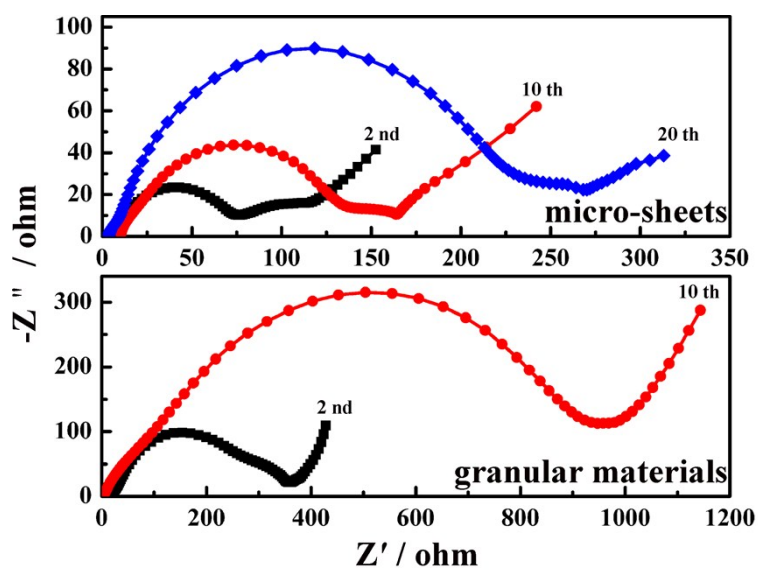

Fig. S7 EIS of the  $\text{Na}_{0.5}\text{Ni}_{0.25}\text{Mn}_{0.75}\text{O}_2$  micro-sheets (1000 °C) and granular materials (800 °C) electrodes collected in part discharged state at about 3.9 V after different cycles at 0.2 C.

Table S1 Electrochemical properties of  $\text{Na}_{0.5}\text{Ni}_{0.25}\text{Mn}_{0.75}\text{O}_2$  micro-sheets and other current cathode materials.

| <b>Materials</b>                                             | <b>Average Potential</b> | <b>Capacity (<math>\text{mAh g}^{-1}</math>)</b> | <b>Capacity retention</b> | <b>Reference</b> |
|--------------------------------------------------------------|--------------------------|--------------------------------------------------|---------------------------|------------------|
| $\text{Na}_{2/3}\text{Fe}_{1/2}\text{Mn}_{1/2}\text{O}_2$    | 2.75 V                   | 190 ( $13 \text{ mA g}^{-1}$ , 1.5–4.2 V)        | ~79 % (30 cycles)         | Ref 3            |
| $\text{Na}_{1.5}\text{VPO}_{4.8}\text{F}_{0.7}$              | 3.8 V                    | 134 ( $12.9 \text{ mA g}^{-1}$ , 1.5–4.6 V)      | ~95 % (100 cycles)        | Ref 6            |
| $\text{NaMnO}_2$                                             | 2.7 V                    | 190 ( $10 \text{ mA g}^{-1}$ , 2.0–4.2 V)        | 76 % (100 cycles)         | Ref 7            |
| $\text{NaFe}_{1/2}\text{Co}_{1/2}\text{O}_2$                 | 3.1 V                    | 160 ( $12.1 \text{ mA g}^{-1}$ , 2.5–4.0 V)      | 89 % (40 cycles)          | Ref 8            |
| $\text{Na}_{0.61}\text{Ti}_{0.48}\text{Mn}_{0.52}\text{O}_2$ | 2.9 V                    | 86 ( $20 \text{ mA g}^{-1}$ , 1.5–4.0 V)         | 81% (100 cycles)          | Ref 9            |
| $\text{Na}_{2/3}\text{Fe}_{1/2}\text{Mn}_{1/2}\text{O}_2$    | 2.6 V                    | 134.5 ( $13 \text{ mA g}^{-1}$ , 1.5–4.0 V)      | 69 % (40 cycles)          | Ref 10           |
| $\text{Na}_{2/3}\text{Fe}_{1/2}\text{Mn}_{1/2}\text{O}_2$    | 2.6 V                    | ~195 ( $26 \text{ mA g}^{-1}$ , 1.5–4.2 V)       | 90 % (80 cycles)          | Ref 11           |
| $\text{Na}_{0.5}\text{Ni}_{0.25}\text{Mn}_{0.75}\text{O}_2$  | 3.8 V                    | 121 ( $26.8 \text{ mA g}^{-1}$ , 3.2–4.3 V)      | 80 % (50 cycles)          | This work        |
